# Supplementary material for: Enduring protection provided by NMITLI118RT+ and its preparation NMITLI118RT+CFM against ischemia/reperfusion injury in rats
Source: Royal Society of Chemistry journal article supplement (doi:10.1039/c6ra04453k), 2016-01-01
Supplement: c6ra04453k1.pdf [file c6ra04453k1.pdf]

**Supplementary data (figures and tables)**

**Enduring protection provided by NMITLI118RT+ and its preparation NMITLI118RT+CFM  
against ischemia/reperfusion injury in rats**

**Hafsa Ahmad<sup>a</sup>, Sheeba Saji Samuel<sup>b</sup>, Kiran Khandelwal<sup>a</sup>, Abhishek Arya<sup>a</sup>, Shivangi Tripathi<sup>a</sup>,  
Satish Agrawal<sup>a</sup>, Neelam Singh Sanghwan<sup>c</sup>, Rakesh Shukla<sup>b</sup> and Anil Kumar Dwivedi<sup>a\*</sup>**

<sup>a</sup>Division of Pharmaceutics, Central Drug Research Institute, Lucknow, INDIA

<sup>b</sup> Division of Pharmacology, Central Drug Research Institute , Lucknow, INDIA

<sup>c</sup> Department of Metabolic and Structural Biology, Central Institute of Medicinal and Aromatic Plants,  
Lucknow, INDIA

\*Corresponding Author: Dr. A.K. Dwivedi, Division of Pharmaceutics, Central Drug Research Institute, BS 10/1, Sector  
10, Jankipuram Extension, Sitapur Road, Lucknow-226031, INDIA.

Email: [anilcdri@gmail.com](mailto:anilcdri@gmail.com) Contact No.: +91-9415910144

CDRI manuscript No: 239/2015/AKD

**Running Title:** Benefits of NMITLI118RT+CFM in ischemia reperfusion brain injury

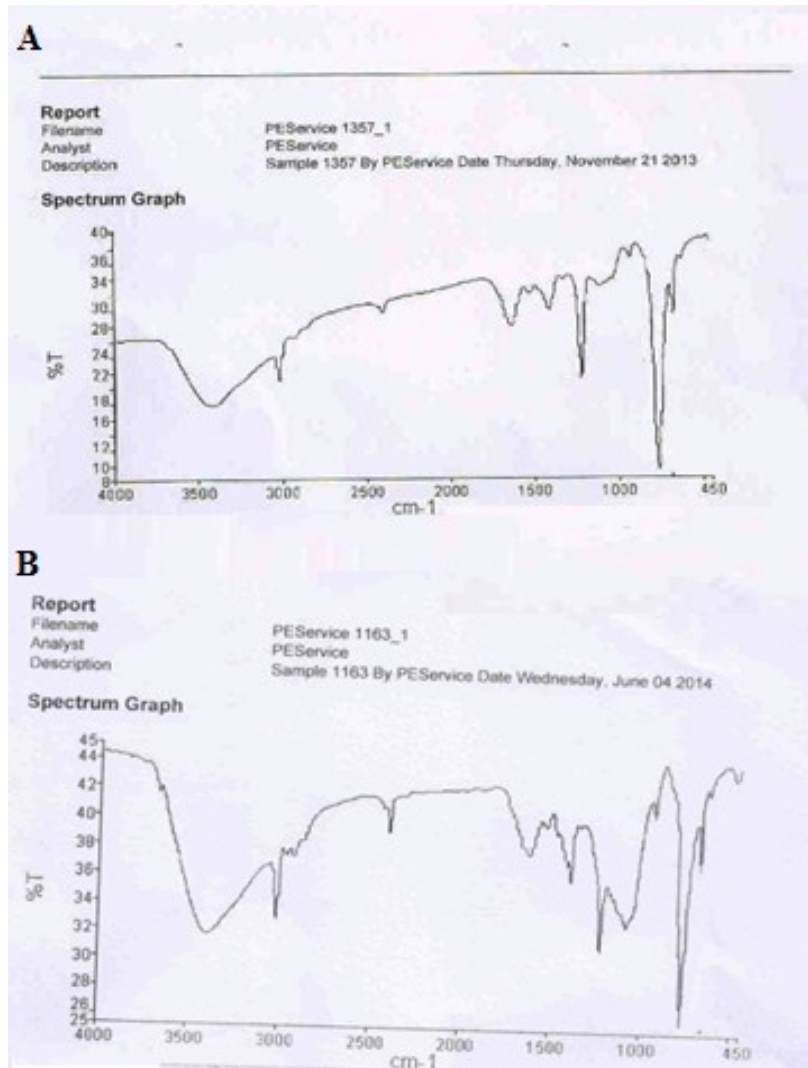

**SF 1:** FT-IR spectra of (A) NMITLI118RT+ (B) NMITLI118RT+CFM

**ST 1:** Flow Properties of NMITLI118RT+CFM

| <b>Parameter</b>             | <b>Values</b> |
|------------------------------|---------------|
| Bulk density                 | 0.167 ± 0.54  |
| Tap density                  | 0.20 ± 0.25   |
| Carr's compressibility Index | 16.5 ± 0.83   |
| Hausner's ratio              | 1.20 ± 0.36   |
| Angle of repose              | 34.68 ± 1.19  |

Values are expressed **mean ± SD**; (n=3)

**ST 2: Weight Variation Test (USP)**

| <b>S. No</b> | <b>Weight in mg</b> | <b>% deviation</b> |  |
|--------------|---------------------|--------------------|--|
| 1            | 372.6               | -1.90              |  |
| 2            | 378.7               | -3.56              |  |
| 3            | 372.9               | -1.90              |  |
| 4            | 371.4               | -1.50              |  |
| 5            | 370.6               | -1.30              |  |
| 6            | 365.1               | 0.15               |  |
| 7            | 359.1               | 1.79               |  |
| 8            | 365.8               | -0.04              |  |
| 9            | 369.1               | -0.9               |  |
| 10           | 365.1               | 0.15               |  |
| 11           | 362.0               | 0.99               |  |
| 12           | 374.4               | -2.30              |  |
| 13           | 370.0               | -1.18              |  |
| 14           | 366.5               | -0.23              |  |
| 15           | 367.0               | -0.36              |  |
| 16           | 359.0               | 1.80               |  |
| 17           | 358.0               | 2.09               |  |
| 18           | 353.7               | 3.20               |  |
| 19           | 361.6               | 1.10               |  |
| 20           | 350.4               | 4.17               |  |

**Average weight of 20 capsules**

Average weight =  $7313/20 = 365.65$  mg

**Lower test limit (90% of average) USP**

**weight variation**

90% of Average weight =  $329.085$  mg

**Upper test limit (110% of average) USP**

**weight variation**

110% of Average weight =  $402.215$  mg

**ST 3: Content Uniformity Test (USP)**

**Mean Conc. Found (Average of 10 capsules)**

Mean conc. =  $2.845 \pm 0.210$

**S. No**  
**Conc. ( $\mu\text{g}/\text{mg}$ ) of**  
**Withanolide A**

**Conc. Of Withanolide A found in NMITLI118RT+**

=  $6.440 \mu\text{g}/\text{mg}$

1 2.613

2 3.158

3 2.829

4 2.740

5 2.802

6 2.604

7 2.857

8 2.821

9 2.774

10 3.259

---

**Desired Potency Value for a capsule where 1g fill material**

**contains 430 mg NMITLI118RT+**

=  $6.440 \times 430 / 1000 = 2.769$

---

**Potency Range (for 9 capsules assayed)**

85%-----2.353

115%---3.184

**Potency Range (for 10<sup>th</sup> capsule assayed)**

75%-----2.0769

125%---3.461
